# Supplementary material for: Meteorological drought in the Miño-Limia-Sil hydrographic demarcation: The role of atmospheric drivers
Source: Copernicus journal article supplement (doi:10.5194/nhess-2019-314), 2019-09-25
Supplement: Supplementary file 1 [file nhess-2019-314-supplement.pdf]

# Meteorological drought in the Miño-Limia-Sil hydrographic demarcation: The role of atmospheric drivers

5 Rogert Sorí<sup>1</sup>, Marta Vázquez<sup>1,2,3</sup>, Milica Stojanovic<sup>2,3</sup>, Raquel Nieto<sup>1</sup>, Margarida Liberato<sup>2,3</sup>, Luis Gimeno<sup>1</sup>,

<sup>1</sup>Environmental Physics Laboratory (EPhysLab), CIM-UVigo, Universidade de Vigo, Ourense, 32004 Spain

<sup>2</sup>Instituto Dom Luiz, Faculdade de Ciências da Universidade de Lisboa, Campo Grande, Portugal

<sup>3</sup>Escola de Ciências e Tecnologia, Universidade de Trás-os-Montes e Alto Douro, Vila Real, Portugal

10 *Correspondence to:* Rogert Sorí (rogert.sori@uvigo.es)

**Supplementary files**

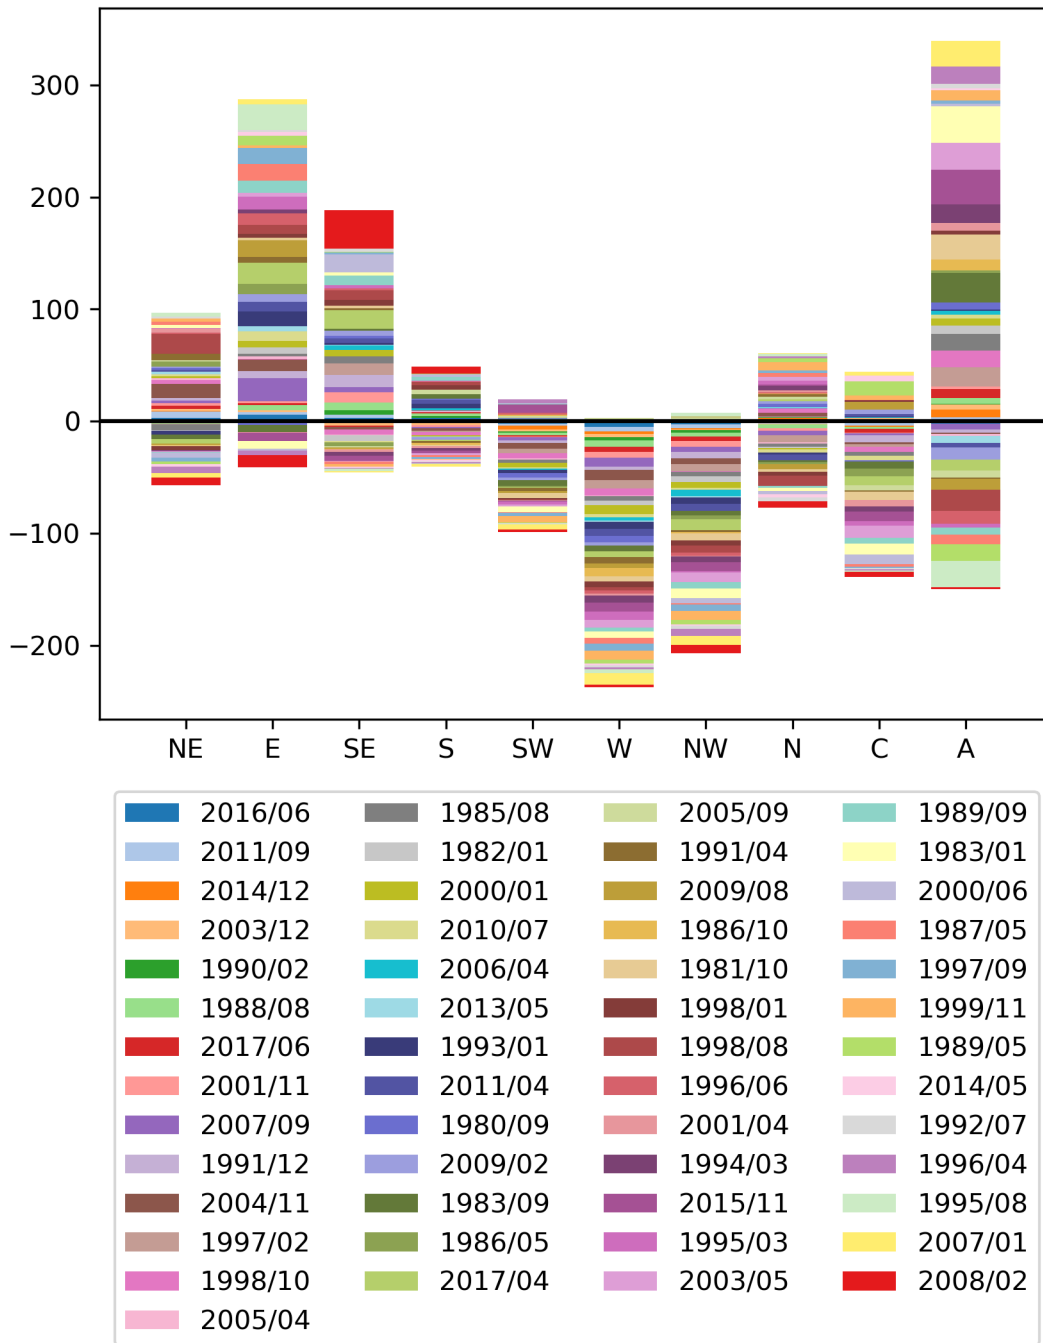

**Figure S1.** The anomaly in the percentage of occurrence of each weather type associated with all drought episodes in the period 1980 – 2017.
